# Supplementary material for: Comparison of Metabolome and Functional Properties of Three Korean Cucumber Cultivars
Source: Front Plant Sci. 2022 Apr 15;13:882120. doi: 10.3389/fpls.2022.882120 (PMC9051474; doi:10.3389/fpls.2022.882120)
Supplement: Supplementary file 1 [file Data_Sheet_1.xlsx]

## Sheet: Table S1
	No.	Tentative Identificationa	HS-SPME-GC-TOF-MS
			Ret (min)b	Unique mass(m/z)	MS fragment pattern(m/z)	CAS	Molecular Formula	Weight	ID
	Aldehydes
	1	Propanal	1.408	58	58, 57, 55, 56, 59, 53, 45, 54	123-38-6	C3H6O	58	Lib/MSC
	2	(E)-2-Pentenal	2.91833	83	55, 83, 84, 53, 56, 50, 51, 69	1576-87-0	C5H8O	84	Lib/MS
	3	Hexanal	3.48333	56	56, 57, 45, 55, 72, 67, 58, 82	66-25-1	C6H12O	100	Lib/MS
	4	2-Hexenal	4.32167	98	55, 69, 57, 83, 56, 70, 53, 54	6728-26-3	C6H10O	98	Lib/MS
	5	Heptanal	5.11167	70	55, 70, 57, 45, 81, 71, 68, 67	111-71-7	C7H14O	114	Lib/MS
	6	2,4-Heptadienal	6.755	81	81, 53, 67, 55, 68, 79, 51, 110	881395	C7H10O	110	Lib/MS
	7	(E)-2-Nonenal	7.285	69	69, 55, 57, 70, 56, 68, 83, 81	18829-56-6	C9H16O	140	Lib/MS
	8	(E)-6-Nonenal	8.43667	98	55, 67, 54, 81, 71, 79, 70, 69	2277-20-5	C9H16O	140	Lib/MS
	9	(Z)-6-Nonenal	8.475	93	55, 54, 67, 81, 70, 57, 79, 69	2277-19-2	C9H16O	140	Lib/MS
	10	(E,Z)-2,6-Nonadienal	9.12333	109	70, 69, 67, 79, 81, 68, 53, 95	557-48-2	C9H14O	138	Lib/MS
	11	Nonenal	9.36833	70	55, 70, 57, 69, 83, 56, 67, 81	2277-19-2	C9H16O	140	Lib/MS
	12	Decanal	10.0433	57	57, 55, 56, 67, 68, 70, 71, 82	112-31-2	C10H20O	156	Lib/MS
	13	Tridecanal	14.1367	154	57, 55, 82, 67, 68, 69, 56, 81	10486-19-8	C13H26O	198	Lib/MS
	14	Tetradecanal	15.34	168	57, 55, 82, 67, 68, 69, 56, 81	124-25-4	C14H28O	212	Lib/MS
	Alcohols
	15	1-Heptanol	6.285	70	55, 56, 77, 106, 105, 69, 57, 51	111-70-6	C7H16O	116	Lib/MS
	Sesquiterpenoids
	16	α-Humulene	13.595	93	93, 80, 91, 79, 67, 92, 77, 121	6753-98-6	C15H24	204	Lib/MS
	17	β-Ionone	13.9417	177	57, 71, 123, 85, 55, 56, 177, 69	79-77-6	C13H20O	192	Lib/MS
	Ketones
	18	3,5-Octadien-2-one	7.98667	95	95, 55, 56, 81, 79, 53, 70, 69	38284-27-4	C8H12O	124	Lib/MS
	Furans
	19	2-Pentyl-furan	6.64667	81	81, 82,53, 138, 51, 95, 94, 68	3777-69-3	C9H14O	138	Lib/MS
	Alkanes
	20	Tetradecane	12.6917	57	57, 71, 85, 55, 56, 70, 69, 99	629-59-4	C14H30	198	Lib/MS
	Non-identification
	21	N.I.d (1)	3.48333	67	67, 55, 52, 53, 77, 69, 79
	22	N.I. (2)	5.43833	122	107, 122, 108, 65, 51, 71, 340
	23	N.I. (3)	8.355	137	52, 137, 124, 63, 109, 75, 108
	24	N.I. (4)	8.58	267	267, 53, 79, 67, 126, 68, 65

## Sheet: Table S2
	No.	Tentative Identificationa	GC-TOF-MS
			Ret (min)b	Unique mass(m/z)	MS fragment pattern(m/z)	TMS	ID
	Amino acids & amines
	1	Alanine	5.34333	116	73,116,147,59,75,117,77,74,103,100,58	2	Lib/STD
	2	Valine	6.565	144	73,144,147,59,218,75,100,74,145,72,103	2	Lib/STD
	3	Ethanolamine	7.07	174	73,174,86,100,59,147,175,75,74,133,130	3	Lib/STD
	4	Leucine	7.12167	158	73,158,59,100,102,74,159,57,86,160,130	2	Lib/STD
	5	Isoleucine	7.34167	158	73,158,74,218,100,59,159,147,58,86,103	2	Lib/STD
	6	Aspartic acid	9.365	232	73,232,100,75,147,74,218,117,59,233,133	3	Lib/STD
	7	Proline	9.42167	156	73,156,75,147,157,74,59,58,84,258,230	2	Lib/STD
	8	GABA	9.44	174	73,174,147,75,86,59,100,175,74,304,133	3	Lib/STD
	9	Glutamic acid	10.1433	246	73,75,246,84,128,147,56,156,74,59,247	3	Lib/STD
	10	Phenylalanine	10.2417	218	73,218,192,100,75,147,74,91,219,59,120	2	Lib/STD
	11	Glutamine	11.3367	156	73,75,156,74,147,157,59,77,131,56,155	3	Lib/STD
	12	Lysine	12.3683	174	174,156,128,76,230,175,317,176,200,154,318	4	Lib/STD
	13	Tyrosine	12.4933	179	73,218,219,100,179,147,74,220,280,77,180	3	Lib/MS
	14	Tryptophan	14.26	202	73,202,203,74,291,204,59,130,147,145,103	3	Lib/STD
	Organic acids
	15	Lactic acid	4.885	117	73,147,117,66,75,77,59,74,148,88,190	2	Lib/STD
	16	Malonic acid	6.43833	147	147,73,75,66,148,77,72,74,59,143,133	2	Lib/STD
	17	Succinic acid	7.49667	247	147,73,75,55,56,148,77,247,149,129,74	2	Lib/STD
	18	Fumaric acid	7.78667	245	73,245,75,147,143,246,53,115,133,83,59	2	Lib/STD
	19	Malic acid	9.12333	133	73,147,55,75,74,133,59,101,148,117,149	3	Lib/STD
	20	2-Hydroxyglutaric acid	9.78833	247	129,77,75,247,155,85,156,203,133,56,78	3	Lib/MS
	21	Citric acid	11.6717	273	73,147,273,75,67,133,74,148,274,211,72	4	Lib/STD
	Sugars & Sugar alcohols
	22	Glycerol	7.15	218	73,147,117,103,205,133,59,75,74,148,101	3	Lib/STD
	23	Glyceric acid	7.70667	189	73,147,103,133,75,189,102,59,117,74,101	3	Lib/MS
	24	Threonic acid	9.72333	292	73,147,117,75,103,292,74,220,55,102,205	4	Lib/STD
	25	Xylose	10.5067	103	103,217,147,73,75,133,117,307,104,189,160	4	Lib/STD
	26	Xylitol	10.9833	217	73,147,103,217,117,129,205,75,74,59,133	5	Lib/STD
	27	Ribitol	11.0233	217	73,217,103,129, 205,133,218,189,101	5	Lib/STD
	28	Fructose	12.14	103	73,103,147,74,117,133,89,217,59,148	5	Lib/STD
	29	Galactose	12.3367	160	73,160,147,74,103,205,75,320,148,161,217	5	Lib/STD
	30	Glucose	12.4417	160	73,103,147,160,74,117,133,89,59,75,129	5	Lib/STD
	31	myo-inositol	13.535	191	73,147,217,191,74,133,129,103,75,147,204	6	Lib/STD
	Fatty acids
	32	Palmitic acid	13.0467	117	73,117,75,132,129,55,145,118,131,313,61	1	Lib/STD
	33	Linoleic acid	14.0717	81	75,73,67,55,81,129,77,117,95,79,54	1	Lib/STD
	34	Oleamide	15.2267	144	75,73,131,116,128,144,55,77,74,91,69	1	Lib/STD

## Sheet: Table S3
	No.	Tentative Identificationa	UHPLC-Orbitrap-MS/MS
			Ret (min)b	[M-H]-	[M+H]+	M.W.	Molecular Formula	Error (ppm)	MSn fragment pattern (m/z)c	ID
	Flavonoids
	1	Saponarin 4'-O-glucoside	4.01	755.203	757.217	756	C33H40O20	-0.684	(‒)755>593, 455, 413	Kitajima et al. 2003
	2	Quercetin 7-O-glucoside-3-O-rutinoside	4.2	771.199	773.214	772	C33H40O21	-0.261	(‒)771>609	Brito et al. 2014
	3	Vicenin-2	4.66	593.15	595.164	594	C27H30O15	-1.843	(‒)593>575, 413> 353	Santos et al. 2012
	4	Lucenin-2-methyl ether	4.74	623.16	625.174	624	C28H32O16	-3.302	(‒)623>605, 503>413, 383	Abu Reidah, 2013
	5	Apigetrin	4.87	431.098	433.112	432	C21H20O10	-0.626	(‒)431>341, 311, 269	Ul Haq et al. 2019
	6	Scoparin	4.96	461.108	463.122	462	C22H22O11	-1.702	(‒)461>341>298	Brito et al. 2014
	7	Isovitexin 2''-O- (6'''-feruloyl)glucoside	5.05	769.196	771.212	770	C37H38O18	-3.299	(‒)769>751>323, 308	Zhao et al. 2016
	8	Isovitexin 2''-O- (6'''-(E)-p-coumaroyl)glucoside	5.07	739.187	741.201	740	C36H36O17	-1.451	(‒)739>707,575>293	Zhao et al. 2016
	9	Isorhamnetin-3-O-glucoside	5.24	477.104	479.117	478	C22H22O12	-0.103	(‒)477>314>300, 270	Du et al. 2014
	10	Homoeriodictyol	6.5	301.072	303.086	302	C16H14O6	0.66	(‒)301>286>134	Lévèques et al. 2012
	Hydroxycinnamate derivatives
	11	p-Coumaric acid-O-glucoside	3.67	325.093	‒	326	C15H18O8	-0.279	(‒)325>163>119	Moco et al. 2006
	12	Feruloyl glucose	3.71	355.104	‒	356	C16H20O9	1.252	(‒)355>311, 193	Serafini et al. 2002
	13	Sinapic acid-hexoside	3.97	385.114	‒	386	C17H22O10	-1.091	(‒)385>367, 223>208	Abu-Reidah et al. 2012
	Lipids
	14	LysoPE(18:3)	8.04	474.262	476.276	475	C23H42NO7P	-2.345	(‒)474>456	Suárez-García et al. 2017
	15	LysoPC(18:3)	8.19	562.3135e	518.322	517	C26H48NO7P	-3.117	(+)518>184	Suárez-García et al. 2017
	16	LysoPE(18:2)	8.44	476.278	478.292	477	C23H44O7NP	-2.123	(+)478>460, 337	Suárez-García et al. 2017
	17	LysoPI(18:1)	8.53	597.303	-	598	C27H51O12P	-1.886	(‒)597>417,315,281	Chen et al. 2017
	18	LysoPE(16:0)	8.72	452.277	454.292	453	C21H44NO7P	-2.456	(+)454>436, 313	Suárez-García et al. 2017
	19	LysoPC(16:0)	8.97	540.3295e	496.339	495	C24H50NO7P	-2.349	(+)496>184	Suárez-García et al. 2017
	20	LysoPA(18:1)	9.83	435.253	-	436	C21H41O7P	2.933	(‒)435>153	Suárez-García et al. 2017
	21	9-OxoOTrE	8.76	291.197	293.21	292	C18H28O3	0.11	(‒)291>273>185	Zhao et al. 2016
	Non-identification
	22	N.I.d 1	4.12	785.212	787.227	786	‒	‒	(‒)785>769> 607	‒
	23	N.I. 2	6.04	226.108	‒	227	‒	‒	(‒)226>182>164	‒
	24	N.I. 3	7.07	341.233	365.2290f	342	‒	‒	(‒)341>323>273	‒
	25	N.I. 4	7.64	235.17	237.184	236	‒	‒	(‒)235>217	‒
	26	N.I. 5	7.64	253.181	255.195	254	‒	‒	(‒)253>235>173	‒
	27	N.I. 6	7.81	675.358	699.3543f	676	‒	‒	(‒)675>657>217	‒
	28	N.I. 7	7.82	291.197	293.21	292	‒	‒	(‒)291>273>255,213	‒
	29	N.I. 8	8.44	614.329	616.344	615	‒	‒	(‒)614>596>434,237	‒
	30	N.I. 9	8.44	559.3111e	537.3019f	514	‒	‒	(‒)559>541	‒
	31	N.I. 10	10.27	295.2278e	251.236	250	‒	‒	(‒)295>277>137	‒
	32	N.I. 11	10.44	997.5703e	975.5623f	952	‒	‒	(‒)997>978>933,305	‒
	33	N.I. 12	10.62	995.5562e	973.5462f	950	‒	‒	(‒)995>977,949>829,361	‒

## Sheet: Table S4
	No.	Tentative Identificationa	HS-SPME-GC-TOF-MS
			Ret (min)b	Unique mass(m/z)	MS fragment pattern(m/z)	CAS	Molecular Formula	Weight	ID
	Aldehydes
	1	Propanal	1.408	58	58, 57, 55, 56, 59, 53, 45, 54	123-38-6	C3H6O	58	Lib/MSC
	2	(E)-2-Pentenal	2.91833	83	55, 83, 84, 53, 56, 50, 51, 69	1576-87-0	C5H8O	84	Lib/MS
	3	Hexanal	3.48333	56	56, 57, 45, 55, 72, 67, 58, 82	66-25-1	C6H12O	100	Lib/MS
	4	2-Hexenal	4.32167	98	55, 69, 57, 83, 56, 70, 53, 54	6728-26-3	C6H10O	98	Lib/MS
	5	Heptanal	5.11167	70	55, 70, 57, 45, 81, 71, 68, 67	111-71-7	C7H14O	114	Lib/MS
	6	2-Heptenal	6.06333	83	55, 57, 83, 56, 69, 70, 68, 53	18829-55-5	C7H12O	112	Lib/MS
	7	2,4-Heptadienal	6.755	81	81, 53, 67, 55, 68, 79, 51, 110	881395	C7H10O	110	Lib/MS
	8	(E)-2-Nonenal	7.285	69	69, 55, 57, 70, 56, 68, 83, 81	18829-56-6	C9H16O	140	Lib/MS
	9	(E)-2-Octenal	7.76	70	55, 70, 57, 83, 69, 67, 82,58	2548-87-0	C8H14O	126	Lib/MS
	10	(E)-6-Nonenal	8.43667	98	55, 67, 54, 81, 71, 79, 70, 69	2277-20-5	C9H16O	140	Lib/MS
	11	(Z)-6-Nonenal	8.475	93	55, 54, 67, 81, 70, 57, 79, 69	2277-19-2	C9H16O	140	Lib/MS
	12	(E,Z)-2,6-Nonadienal	9.12333	109	70, 69, 67, 79, 81, 68, 53, 95	557-48-2	C9H14O	138	Lib/MS
	13	Nonenal	9.36833	70	55, 70, 57, 69, 83, 56, 67, 81	2277-19-2	C9H16O	140	Lib/MS
	14	Decanal	10.0433	57	57, 55, 56, 67, 68, 70, 71, 82	112-31-2	C10H20O	156	Lib/MS
	15	Tridecanal	14.1367	154	57, 55, 82, 67, 68, 69, 56, 81	10486-19-8	C13H26O	198	Lib/MS
	16	Tetradecanal	15.34	168	57, 55, 82, 67, 68, 69, 56, 81	124-25-4	C14H28O	212	Lib/MS
	Alcohols
	17	1-Heptanol	6.285	70	55, 56, 77, 106, 105, 69, 57, 51	111-70-6	C7H16O	116	Lib/MS
	18	1-Nonanol	9.51833	56	55, 56, 67, 70, 69, 68, 57, 82	143-08-8	C9H20O	144	Lib/MS
	19	β-Bisabolene	14.1767	93	69, 93, 67, 57, 55, 68, 82, 91	25532-79-0	C15H24	204	Lib/MS
	Sesquiterpenoids
	20	α-Humulene	13.595	93	93, 80, 91, 79, 67, 92, 77, 121	6753-98-6	C15H24	204	Lib/MS
	21	β-Ionone	13.9417	177	57, 71, 123, 85, 55, 56, 177, 69	79-77-6	C13H20O	192	Lib/MS
	Ketones
	22	3,5-Octadien-2-one	7.98667	95	95, 55, 56, 81, 79, 53, 70, 69	38284-27-4	C8H12O	124	Lib/MS
	Furans
	23	2-Pentyl-furan	6.64667	81	81, 82,53, 138, 51, 95, 94, 68	3777-69-3	C9H14O	138	Lib/MS
	Alkanes
	24	Tetradecane	12.6917	57	57, 71, 85, 55, 56, 70, 69, 99	629-59-4	C14H30	198	Lib/MS
	25	Pentadecane	13.9533	113	57, 71, 55, 85, 56, 177, 70, 69	629-62-9	C15H32	212	Lib/MS
	Non-identification
	26	N.I.d (1)	3.48333	67	67, 55, 52, 53, 77, 69, 79
	27	N.I. (2)	5.43833	122	107, 122, 108, 65, 51, 71, 340
	28	N.I. (3)	8.355	137	52, 137, 124, 63, 109, 75, 108
	29	N.I. (4)	8.58	267	267, 53, 79, 67, 126, 68, 65

## Sheet: Table S5
	No.	Tentative Identificationa	GC-TOF-MS
			Ret (min)b	Unique mass(m/z)	MS fragment pattern(m/z)	TMS	ID
	Amino acids & amines
	1	Valine	6.565	144	73,144,147,59,218,75,100,74,145,72,103	2	Lib/STD
	2	Ethanolamine	7.07	174	73,174,86,100,59,147,175,75,74,133,130	3	Lib/STD
	3	Leucine	7.12167	158	73,158,59,100,102,74,159,57,86,160,130	2	Lib/STD
	4	Isoleucine	7.34167	158	73,158,74,218,100,59,159,147,58,86,103	2	Lib/STD
	5	Glycine	7.47	174	73,174,86,147,59,100,175,133,248,74,75	3	Lib/STD
	6	Serine	7.97	218	73,204,218,100,75,147,59,116,74,205,77	3	Lib/STD
	7	Aspartic acid	9.365	232	73,232,100,75,147,74,218,117,59,233,133	3	Lib/STD
	8	GABA	9.44	174	73,174,147,75,86,59,100,175,74,304,133	3	Lib/STD
	9	Glutamic acid	10.1433	246	73,75,246,84,128,147,56,156,74,59,247	3	Lib/STD
	10	Phenylalanine	10.2417	218	73,218,192,100,75,147,74,91,219,59,120	2	Lib/STD
	11	Lysine	12.3683	174	174,156,128,76,230,175,317,176,200,154,318	4	Lib/STD
	12	Tryptophan	14.26	202	73,202,203,74,291,204,59,130,147,145,103	3	Lib/STD
	Organic acids
	13	Lactic acid	4.885	117	73,147,117,66,75,77,59,74,148,88,190	2	Lib/STD
	14	Malonic acid	6.43833	147	147,73,75,66,148,77,72,74,59,143,133	2	Lib/STD
	15	Succinic acid	7.49667	247	147,73,75,55,56,148,77,247,149,129,74	2	Lib/STD
	16	Fumaric acid	7.78667	245	73,245,75,147,143,246,53,115,133,83,59	2	Lib/STD
	17	Malic acid	9.12333	133	73,147,55,75,74,133,59,101,148,117,149	3	Lib/STD
	18	2-Hydroxyglutaric acid	9.78833	247	129,77,75,247,155,85,156,203,133,56,78	3	Lib/MS
	19	Citric acid	11.6717	273	73,147,273,75,67,133,74,148,274,211,72	4	Lib/STD
	Sugars & Sugar alcohols
	20	Glyceric acid	7.70667	189	73,147,103,133,75,189,102,59,117,74,101	3	Lib/MS
	21	Threonic acid	9.72333	292	73,147,117,75,103,292,74,220,55,102,205	4	Lib/STD
	22	Xylose	10.5067	103	103,217,147,73,75,133,117,307,104,189,160	4	Lib/STD
	23	Xylitol	10.9833	217	73,147,103,217,117,129,205,75,74,59,133	5	Lib/STD
	24	Ribitol	11.0233	217	73,217,103,129, 205,133,218,189,101,204,206	5	Lib/STD
	25	Fructose	12.14	103	73,103,147,74,117,133,89,217,59,148	5	Lib/STD
	26	Galactose	12.3367	160	73,160,147,74,103,205,75,320,148,161,217	5	Lib/STD
	27	Glucose	12.4417	160	73,103,147,160,74,117,133,89,59,75,129	5	Lib/STD
	28	myo-inositol	13.535	191	73,147,217,191,74,133,129,103,75,147,204	6	Lib/STD
	Fatty acids
	29	Linoleic acid	14.0717	81	75,73,67,55,81,129,77,117,95,79,54	1	Lib/STD

## Sheet: Table S6
	No.	Tentative Identificationa	UHPLC-Orbitrap-MS/MS
			Ret (min)b	[M‒H]‒	[M+H]+	M.W.	Molecular Formula	Error (ppm)	MSn fragment pattern (m/z)c	ID
	Flavonoids
	1	Saponarin 4'-O-glucoside	4.01	755.203	757.217	756	C33H40O20	-0.684	(-)755>593, 455, 413	Kitajima et al. 2003
	2	Quercetin 7-O-glucoside-3-O-rutinoside	4.2	771.199	773.214	772	C33H40O21	-0.261	(-)771>609	Brito et al. 2014
	3	Eriodictyol-7-O-glucoside	4.3	449.11	451.121	450	C21H22O11	2.261	(-)449>287	Abu Reidah, 2013
	4	Vicenin-2	4.66	593.15	595.164	594	C27H30O15	-1.843	(-)593>575, 413> 353	Ul Haq et al. 2019
	5	Lucenin-2-methyl ether	4.74	623.16	625.174	624	C28H32O16	-3.302	(-)623>605, 503>413, 383	Santos et al. 2012
	6	Apigetrin	4.87	431.098	433.112	432	C21H20O10	-0.626	(-)431>341, 311, 269	Zhao et al. 2016
	7	Scoparin	4.96	461.108	463.122	462	C22H22O11	-1.702	(-)461>341>298	Brito et al. 2014
	8	Isovitexin 2''-O-(6'''-feruloyl)glucoside	5.05	769.196	771.212	770	C37H38O18	-3.299	(-)769>751>323, 308	Du et al. 2014
	9	Isovitexin 2''-O-(6'''-(E)-p-coumaroyl)glucoside	5.07	739.187	741.201	740	C36H36O17	-1.451	(-)739>707,575>293	Du et al. 2014
	10	Isorhamnetin-3-O-glucoside	5.24	477.104	479.117	478	C22H22O12	-0.103	(-)477>314>300, 270	Lévèques et al. 2012
	Hydroxycinnamate derivatives
	11	p-Coumaric acid-O-glucoside	3.67	325.093	‒	326	C15H18O8	-0.279	(-)325>163>119	Moco et al. 2006
	12	Feruloyl glucose	3.71	355.104	‒	356	C16H20O9	1.252	(-)355>311, 193	Serafini et al. 2002
	13	Sinapic acid-hexoside	3.97	385.114	‒	386	C17H22O10	-1.091	(-)385>367, 223>208	Abu-Reidah et al. 2012
	Lipids
	14	9-OxoOTrE	8.76	291.197	293.21	292	C18H28O3	0.11	(-)291>273>185	Zhao et al. 2016
	15	Lyso-PA(18:1)	9.83	435.253	‒	436	C21H41O7P	2.933	(-)435>153	Suárez-García et al. 2017
	Non-identification
	16	N.I.d 1	4.12	785.212	787.227	786	‒	‒	(-)785>769> 607	‒
	17	N.I. 3	7.07	341.233	365.2290f	342	‒	‒	(-)341>323>273	‒
	18	N.I. 5	7.64	253.181	255.195	254	‒	‒	(-)253>235>173	‒
	19	N.I. 6	7.81	675.358	699.3543f	676	‒	‒	(-)675>657>217	‒
	20	N.I. 7	7.82	291.197	293.21	292	‒	‒	(-)291>273>255,213	‒
	21	N.I. 13	8.06	638.329	640.344	639	‒	‒	(-)559>476>433	‒
	22	N.I. 9	8.44	559.3111e	537.3019f	514	‒	‒	(-)559>541	‒
	23	N.I. 11	10.44	997.5703e	975.5623f	952	‒	‒	(-)997>978>933,305	‒
	24	N.I. 12	10.62	995.5562e	973.5462f	950	‒	‒	(-)995>977,949>829,361	‒

## Sheet: Table S7
	No.	Sample id	Raw data
			Total read bases	Total reads	GC(%)	Q20(%)	Q30(%)
	1	GF	6920545048	68520248	43.4	98.13	94.48
	2	GP	6197631084	61362684	43.58	98.04	94.31
	3	MF	6709835212	66434012	43.73	98.12	94.51
	4	MP	7001427060	69321060	43.05	98.66	95.74
	5	WF	8658144806	85724206	43.73	98.11	94.49
	6	WP	6298733296	62363696	43.15	98.54	95.54

## Sheet: Table S8
	No.	Sample id	Trimmed data
			Total read bases	Total reads	GC(%)	Q20(%)	Q30(%)
	1	GF	6777231541	67475368	43.43	98.61	95.18
	2	GP	6062934751	60348194	43.61	98.56	95.06
	3	MF	6569813784	65408436	43.76	98.61	95.22
	4	MP	6901709325	68629182	43.07	99	96.24
	5	WF	8473790608	84341196	43.76	98.62	95.23
	6	WP	6203252666	61682094	43.18	98.92	96.08

## Sheet: Table S9
	No.	Sample id	# of processed reads	# of mapped reads (%)	# of unmapped reads (%)
	1	GF	67475368	66,897,706 (99.14%)	577,662 (0.86%)
	2	GP	60348194	59,813,412 (99.11%)	534,782 (0.89%)
	3	MF	65408436	59,294,839 (90.65%)	6,113,597 (9.35%)
	4	MP	68629182	67,877,311 (98.90%)	751,871 (1.10%)
	5	WF	84341196	83,584,104 (99.10%)	757,092 (0.90%)
	6	WP	61682094	61,058,652 (98.99%)	623,442 (1.01%)

## Sheet: Table S10
	No.	Gene ID	Annotationa	EC numberb	Peel			Flesh
					C	M		C	M
	Porphyrin and chlorophyll metabolism
	1	101218189	Divinyl chlorophyllide a 8-vinyl-reductase	1.3.1.75	1.4435	0.692763		0.769388	1.29973
	2	101203653	Chlorophyllase-2	3.1.1.14	1.79789	0.556208		0.975865	1.02473
	3	101206296	Protein STAY-GREEN homolog	4.99.1.10	1.4613	0.684322		0.724053	1.38111
	4	101206600	Magnesium protoporphyrin IX methyltransferase	2.1.1.11	1.53661	0.650784		0.61285	1.63172
	5	101207399	Glutamate-1-semialdehyde 2,1-aminomutase 2	5.4.3.8	1.44749	0.69085		0.840755	1.18941
	6	101208123	7-Hydroxymethyl chlorophyll a reductase	1.17.7.2	1.90413	0.525175		0.907555	1.10186
	7	101208135	Glutamyl-tRNA reductase 2	1.2.1.70	0.972674	1.02809		1.24281	0.804627
	8	101208461	Magnesium-chelatase subunit ChlD	6.6.1.1	1.47222	0.679245		0.64275	1.55581
	9	101209548	Oxygen-dependent coproporphyrinogen-III oxidase	1.3.3.3	0.943362	1.06004		0.778951	1.28378
	10	101212175	Chlorophyll synthase	2.5.1.62 2.5.1.133	0.902586	1.10793		0.814395	1.2279
	11	101212208	Uroporphyrinogen decarboxylase 1	4.1.1.37	1.08288	0.92346		0.831156	1.20314
	12	101212226	Chlorophyll(ide) b reductase NOL	1.1.1.294	0.585644	1.70752		0.922065	1.08452
	13	101213181	Protoporphyrinogen oxidase	1.3.3.4 1.3.3.15	1.00245	0.997552		0.830069	1.20472
	14	101213619	Magnesium-chelatase subunit ChlH	6.6.1.1	2.38732	0.41888		1.16207	0.860537
	15	101214191	Heme oxygenase 1	1.14.15.20	1.66479	0.600676		0.788194	1.26872
	16	101214667	Protoporphyrinogen oxidase 1	1.3.3.4 1.3.3.15	1.29426	0.772642		1.16489	0.858448
	17	101217637	Magnesium-chelatase subunit ChlI	6.6.1.1	1.14381	0.874269		0.896976	1.11486
	18	101217650	Phytochromobilin:ferredoxin oxidoreductase	1.3.7.4	1.35303	0.739084		1.02342	0.977121
	19	101218513	Glutamate--tRNA ligase	6.1.1.17	0.960221	1.04143		0.892642	1.12027
	20	101219179	Magnesium-protoporphyrin IX monomethyl ester [oxidative] cyclase	1.14.13.81	2.37428	0.42118		0.73493	1.36067
	21	101219336	Magnesium dechelatase SGRL	4.99.1.10	0.724223	1.38079		0.581107	1.72085
	22	101219749	Porphobilinogen deaminase	2.5.1.61	0.896405	1.11557		0.688069	1.45334
	23	101220615	Glutamyl-tRNA reductase 1	1.2.1.70	1.36425	0.733003		0.41336	2.4192
	24	101221755	Geranylgeranyl diphosphate reductase	1.3.1.83	1.65087	0.605742		0.631113	1.5845
	25	101222061	Uroporphyrin-III C-methyltransferase	2.1.1.107	0.322851	3.0974		1.32073	0.757159
	26	101222312	Delta-aminolevulinic acid dehydratase	4.2.1.24	1.18668	0.842688		0.742449	1.34689
	27	101222607	Protoheme IX farnesyltransferase	2.5.1.141	0.740952	1.34961		0.982428	1.01789
	28	101222986	Probable chlorophyll(ide) b reductase NYC1	1.1.1.294	0.983211	1.01708		1.18971	0.840542
	29	101223042	Sirohydrochlorin ferrochelatase	4.99.1.4	1.55707	0.642231		0.891269	1.122
	30	101223133	Red chlorophyll catabolite reductase	1.3.7.12	1.87132	0.534383		0.76631	1.30496
	31	101208554	NPR; protochlorophyllide reductase	1.3.1.33	1.54973	0.645275		0.437082	2.2879
	Carotenoid biosynthesis
	32	101212508	Abscisic acid 8'-hydroxylase CYP707A2	1.14.14.137	0.406838	2.45798		2.92416	0.341979
	33	101204647	9-cis-Epoxycarotenoid dioxygenase NCED2	1.13.11.51	0.944882	1.05833		1.40696	0.710753
	34	101204961	Carotene epsilon-monooxygenase	1.14.14.158	1.22324	0.8175		1.04181	0.959868
	35	101206471	Phytoene synthase	2.5.1.32	0.951844	1.05059		1.43896	0.694945
	36	101207778	Lycopene beta cyclase	5.5.1.19	1.86302	0.536763		1.14175	0.875845
	37	101210522	ζ-carotene desaturase	1.3.5.6	1.15084	0.868928		0.678746	1.47331
	38	101211624	15-cis-ζ-carotene isomerase	5.2.1.12	1.36182	0.734311		0.679793	1.47104
	39	101212140	β-carotene hydroxylase 2	1.14.15.24	0.764736	1.30764		1.50045	0.666467
	40	101212850	Prolycopene isomerase	5.2.1.13	1.38113	0.724043		0.949551	1.05313
	41	101213753	Lycopene epsilon cyclase	5.5.1.18	0.911235	1.09741		0.611921	1.6342
	42	101214325	β-carotene 3-hydroxylase 1	1.14.15.24	0.614578	1.62713		1.76248	0.567383
	43	101214823	Phytoene synthase 2	2.5.1.32	2.34999	0.425533		0.882405	1.13327
	44	101215492	Protein LUTEIN DEFICIENT 5	1.14.-.-	0.705737	1.41696		0.816678	1.22447
	45	101218773	Carotenoid cleavage dioxygenase 7	1.13.11.68	0.432376	2.3128		0.892054	1.12101
	46	101219340	β-carotene isomerase D27	5.2.1.14	0.546148	1.831		0.979751	1.02067
	47	101219413	Xanthoxin dehydrogenase	1.1.1.288	1.90183	0.52581		0.893027	1.11979
	48	101220226	Probable carotenoid cleavage dioxygenase 4	1.13.11.51	1.00219	0.997813		0.983879	1.01639
	49	101214535	9-cis-Epoxycarotenoid dioxygenase NCED2	1.13.11.51	1.18064	0.847001		0.652599	1.53234
	50	101219505	9-cis-Epoxycarotenoid dioxygenase NCED3	1.13.11.51	3.54322	0.282229		1.26734	0.789052
	51	101216870	Violaxanthin de-epoxidase	1.23.5.1	1.31789	0.758788		0.844721	1.18382
	52	101212903	Zeaxanthin epoxidase	1.14.15.21	1.96977	0.507674		1.0061	0.99394
	Flavonoid biosynthesis
	53	101204747	Cytochrome P450 CYP73A100	1.14.14.91	1.25865	0.794501		2.94709	0.339318
	54	101205211	Chalcone synthase 2	2.3.1.74	1.82677	0.547413		0.736441	1.35788
	55	101205537	Cytochrome P450 CYP73A100	1.14.14.91	2.13149	0.469155		3.59509	0.278158
	56	101205648	Caffeoyl-CoA O-methyltransferase 5	2.1.1.104	2.65764	0.376274		1.5858	0.630596
	57	101206443	Naringenin,2-oxoglutarate 3-dioxygenase	1.14.11.9	1.2901	0.775133		1.38482	0.722113
	58	101206618	Stemmadenine O-acetyltransferase	2.3.1.133	0.928184	1.07737		0.998427	1.00158
	59	101212121	Putative caffeoyl-CoA O-methyltransferase At1g67980	2.1.1.104	0.648611	1.54176		0.861338	1.16098
	60	101214857	Shikimate O-hydroxycinnamoyltransferase	2.3.1.133	0.473335	2.11267		0.703128	1.42222
	61	101217257	Cytochrome P450 98A2	1.14.14.96	1.46385	0.683129		3.72961	0.268125
	62	101219245	Flavonol synthase/flavanone 3-hydroxylase	1.14.20.6	1.56373	0.639496		1.20217	0.831831
	63	101221846	Trans-cinnamate 4-monooxygenase	1.14.14.91	0.957502	1.04438		1.09106	0.916543
	64	105434566	Cytochrome P450 CYP73A100	1.14.14.91	1.47317	0.678808		3.50385	0.285401
	65	101203846	phenylalanine ammonia-lyase	4.3.1.24	1.84025	0.543405		2.59472	0.385397
	66	101204417	4-coumarate-CoA ligase	6.2.1.12	1.09128	0.916353		0.729463	1.37087
